# Supplementary material for: Rationally constructing a hierarchical two-dimensional NiCo metal–organic framework/graphene hybrid for highly efficient Li+ ion storage
Source: Royal Society of Chemistry journal article supplement (doi:10.1039/d0qm01011a), 2021-01-01
Supplement: d0qm01011a1.pdf [file d0qm01011a1.pdf]

## Electronic Supplementary Information

### **Rationally constructing hierarchical two-dimensional NiCo metal–organic framework/graphene hybrid for highly efficient Li<sup>+</sup> ions storage**

Jun Jin,<sup>a, c</sup> You-fang Zhang,<sup>b, \*</sup> Huanwen Wang,<sup>a</sup> Yansheng Gong,<sup>a</sup> Rui Wang,<sup>a</sup> Beibei He,<sup>a</sup> Tuo Xiao,<sup>a</sup> Yun Zheng,<sup>d</sup> Xianhu Liu,<sup>e</sup> and Kun Zhou<sup>c, f, \*</sup>

<sup>a</sup>*Faculty of Materials Science and Chemistry, China University of Geosciences, Wuhan 430074, China.*

<sup>b</sup>*Hubei Key Laboratory of Polymer Materials, School of Materials Science and Engineering, Hubei University, Wuhan 430062, China. Email: 20190149@hubu.edu.cn*

<sup>c</sup>*School of Mechanical and Aerospace Engineering, Nanyang Technological University, 50 Nanyang Avenue, Singapore 639798, Singapore. Email: kzhou@ntu.edu.sg*

<sup>d</sup>*Key laboratory of optoelectronic Chemical Materials and Devices, Ministry of Education, Jiangnan University, Wuhan 430056, China.*

<sup>e</sup>*National Engineering Research Center for Advanced Polymer Processing Technology, Zhengzhou University, Zhengzhou 450002, China.*

<sup>f</sup>*Environmental Process Modeling Center, Nanyang Environment and Water Research Institute, Singapore 637141, Singapore.*

## Experimental

### Characterizations

The morphology and structures of the samples were characterized by scanning electron microscopy (SEM, JEOL, JSM-7600F) and field emission transmission electron microscopy (TEM, JEOL, JEM-2100F) operating at 200 kV. The X-ray diffraction (XRD) measurement was performed on a Shimadzu XRD-600 instrument with Cu K $\alpha$  radiation ( $\lambda = 0.15404$  nm) operating at 40 kV and 30 mA. The Raman spectra are obtained using a 514 nm micro-Raman spectrometer (Renishaw). The nitrogen adsorption-desorption isotherms and Brunauer–Emmett–Teller (BET) surface areas were measured using a Micrometrics equipment (Tri-star II 3020). The X-ray photoelectron spectroscopy (XPS) characterizations were conducted on a Theta Probe electron spectrometer (VG ESCALAB200i-XL, Thermal Scientific).

### Electrochemical measurements

The electrochemical performances of the 2D MOF-G hybrid electrodes were evaluated in 2032-type coin cells, which were assembled in an argon-filled glove box (MBraun, Inc.) with the concentrations of moisture and oxygen below 0.1 ppm. Lithium metal was used as the counter/reference electrode and 1 M LiPF<sub>6</sub> in ethylene carbonate (EC)/dimethyl carbonate (DMC) was used as the electrolyte. The working electrode slurries were prepared by mixing the active material (*e.g.*, NiCo MOF-G), carbon black (Super P), and polyvinylidene fluoride (PVDF) in a mass ratio of 8:1:1. The homogeneous slurry was then uniformly coated on a copper foil (12 mm in diameter) and dried at 60 °C under vacuum for 12 h. The loading density of active materials (*e.g.*, NiCo MOF-G) in the electrodes is  $\sim 1.2$  mg cm<sup>-2</sup>. Galvanostatic

discharge/charge tests were performed on a Neware battery tester between 0.02 and 3.0 V *versus* Li/Li<sup>+</sup>. Cyclic voltammetry (CV, 0.02–3.0 V) tests were conducted on a Solartron electrochemical workstation. The electrochemical impedance spectroscopy (EIS, 1 MHz–0.1 Hz) spectra were measured using a Zennium Pro electrochemical workstation. The potentiodynamic EIS (PEIS) spectra were collected on the Zennium Pro workstation while the battery unit was discharged/charged at a current density of 1 A g<sup>-1</sup>.

## Results and discussion

**Table S1.** Comparison of the electrochemical properties of MOF-based anode materials.

| Anode material | Capacity / mAh g <sup>-1</sup><br>(cycle number) | Current density / A g <sup>-1</sup> | Ref.         |
|----------------|--------------------------------------------------|-------------------------------------|--------------|
| Mn MOF         | 607 (400)                                        | 0.5                                 | 1            |
| Mn MOF         | 390 (50)                                         | 0.05                                | 2            |
| Cu MOF         | 474 (50)                                         | 0.383                               | 3            |
| Mn MOF         | 494 (500)                                        | 1                                   | 4            |
| Al MOF         | 392 (100)                                        | 0.0375                              | 5            |
| Fe MOF/rGO     | 550 (100)                                        | 0.1                                 | 6            |
| Co MOF/rGO     | 639 (120)                                        | 0.5                                 | 7            |
| Zn MOF         | 480 (10)                                         | 0.5                                 | 8            |
| Co MOF         | 358 (200)                                        | 0.1                                 | 9            |
| Co MOF         | 435 (1000)                                       | 1                                   | 10           |
| Cd MOF         | ~380 (10)                                        | 1                                   | 11           |
| Fe MOF         | 75 (50)                                          | 0.002                               | 12           |
| NiCo MOF-G     | 920 (10)                                         | 0.1                                 | This<br>work |
|                | 736 (10)                                         | 0.5                                 |              |
|                | 640 (500)                                        | 1                                   |              |
|                | 424 (500)                                        | 3                                   |              |

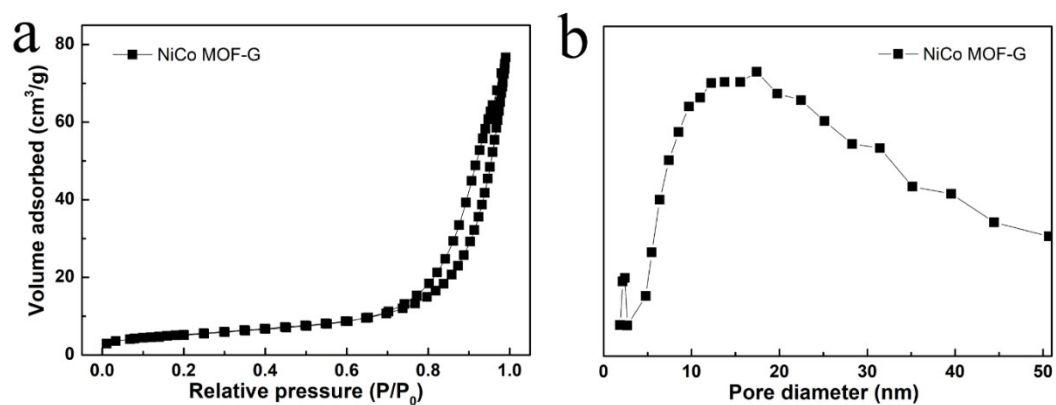

**Figure S1.** (a) N<sub>2</sub> adsorption-desorption isotherm and (b) pore size distribution of the NiCo MOF-G hybrid. The BET specific surface area ( $S_{\text{BET}}$ ) of the NiCo MOF-G hybrid is 19 m<sup>2</sup> g<sup>-1</sup>.

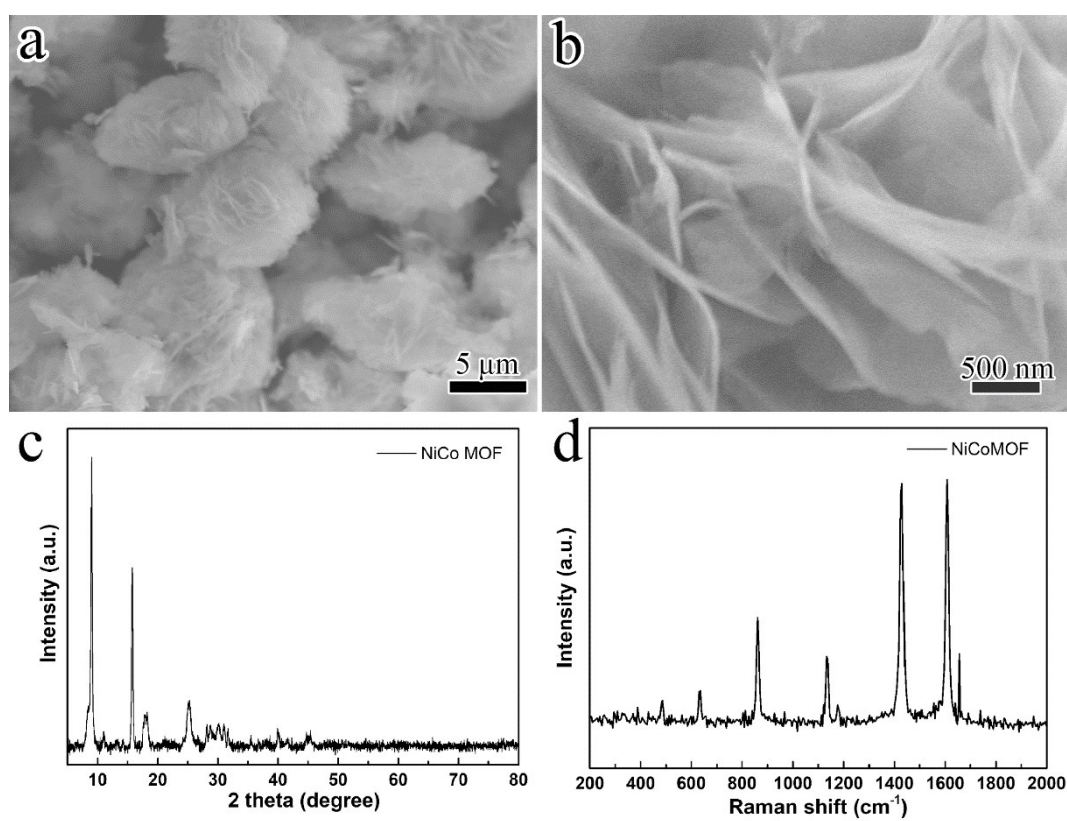

**Figure S2.** (a, b) SEM images, (c) XRD pattern, and (d) Raman spectrum of the 2D NiCo MOF sample.

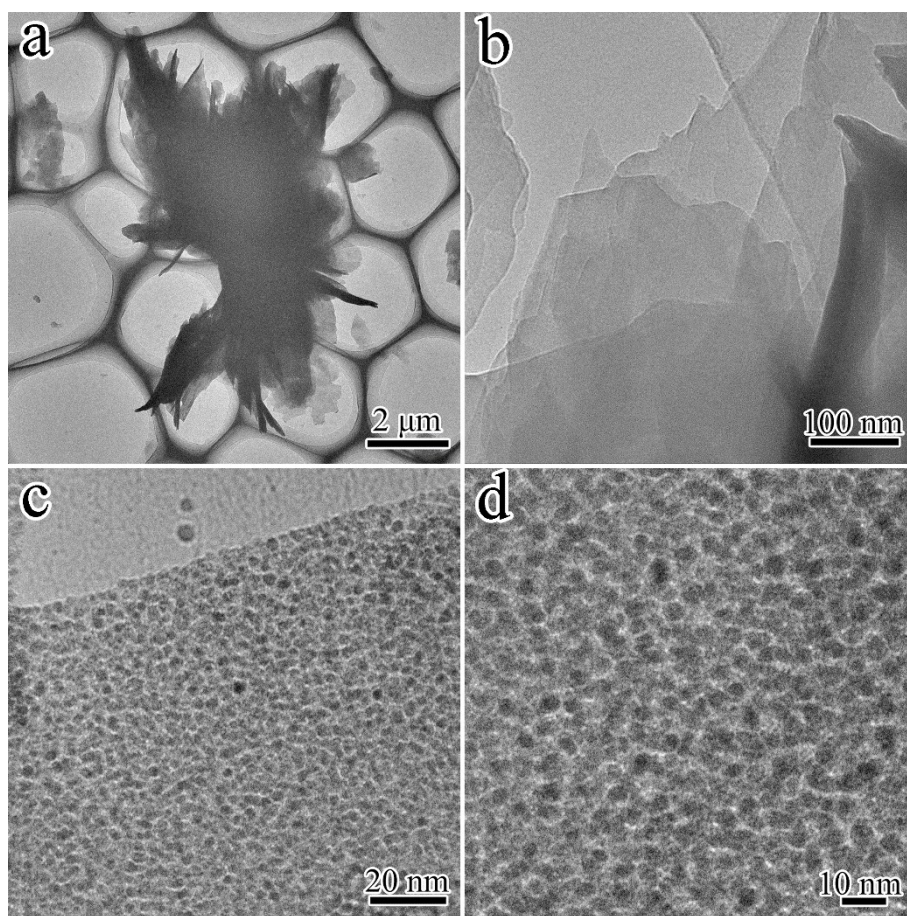

**Figure S3.** (a–d) TEM images of the 2D NiCo MOF sample.

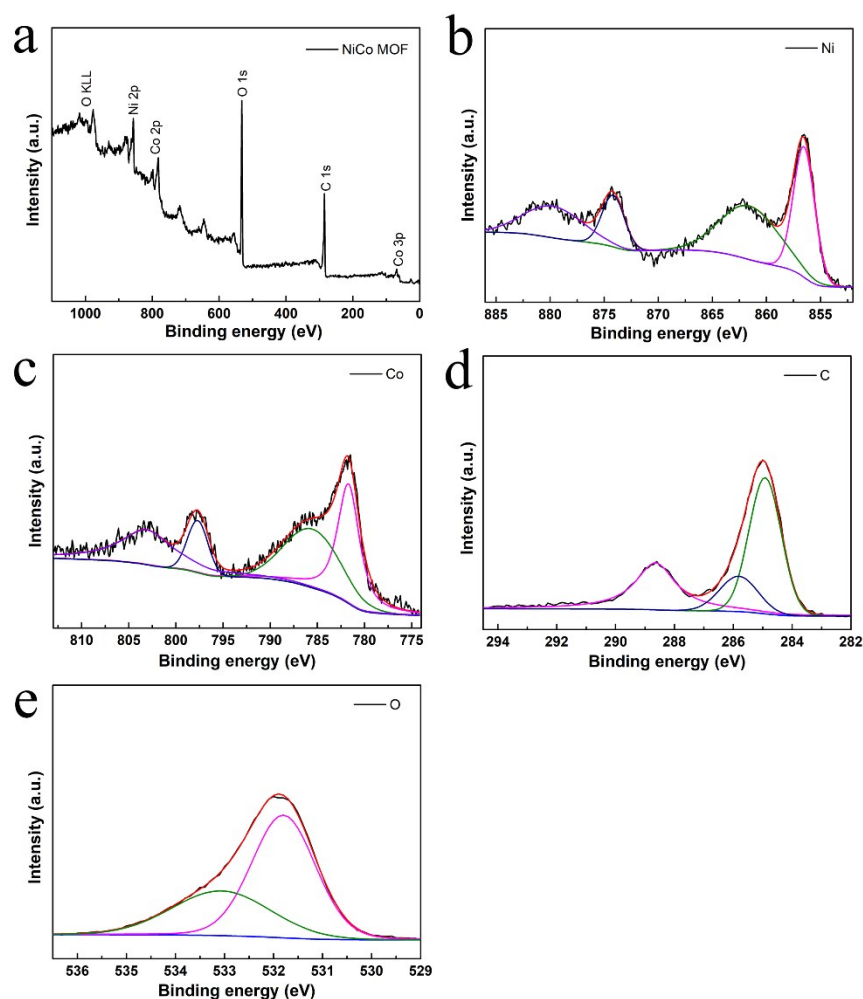

**Figure S4.** XPS spectra of the 2D NiCo MOF sample: (a) survey, (b) Ni 2p, (c) Co 2p, (d) C 1s, and (e) O 1s.

The XPS spectrum in **Figure S4a** confirms the existence of Ni, Co, C, and O elements in NiCo MOF. The two peaks at 856.5 and 874.2 eV in the Ni 2p spectrum (**Figure S4b**) are assigned to Ni 2p<sub>3/2</sub> and Ni 2p<sub>1/2</sub>, respectively. The two peaks at 781.7 and 797.7 eV in the Co 2p spectrum (**Figure S4c**) are ascribed to Co 2p<sub>3/2</sub> and Co 2p<sub>1/2</sub>, respectively. In the C spectrum (**Figure S4d**), three fitted peaks at 284.9, 285.8, and 288.6 eV are attributed to C=C, C–C and O=C–O, respectively. The O spectrum (**Figure S4e**) shows two fitted peaks at 531.8 and 533.0 eV, which are ascribed to the hydroxyl and chemisorbed water, respectively.

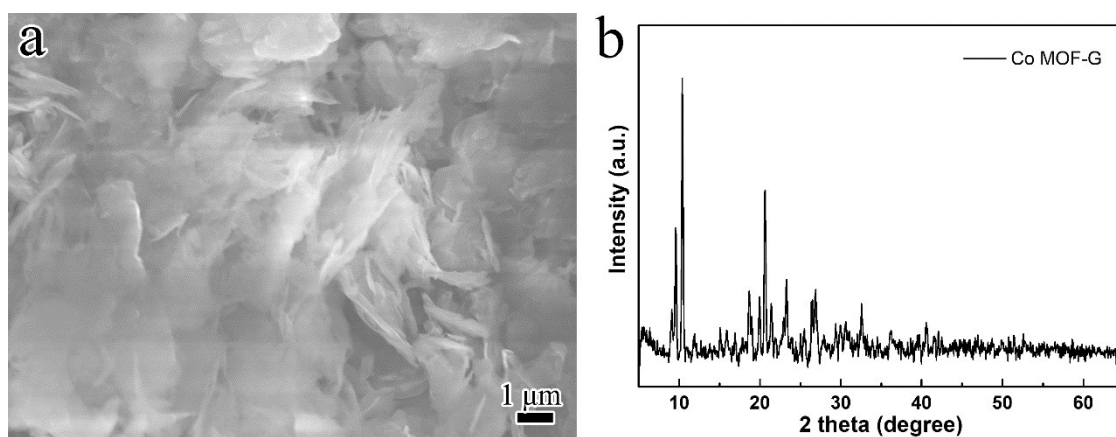

**Figure S5.** (a) SEM image and (b) XRD pattern of the 2D Co MOF-G hybrid.

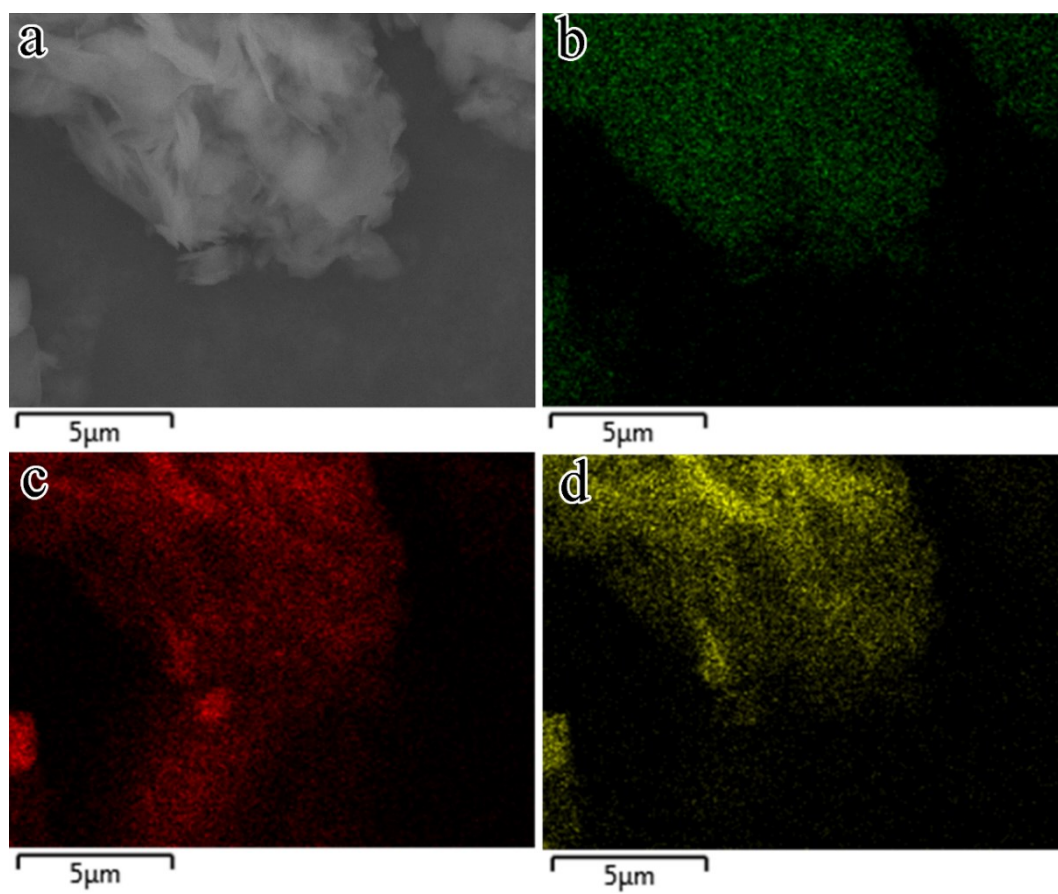

**Figure S6.** SEM-EDS mapping images of the 2D Co MOF-G hybrid: (a) SEM, (b) Co, (c) C, and (d) O elements.

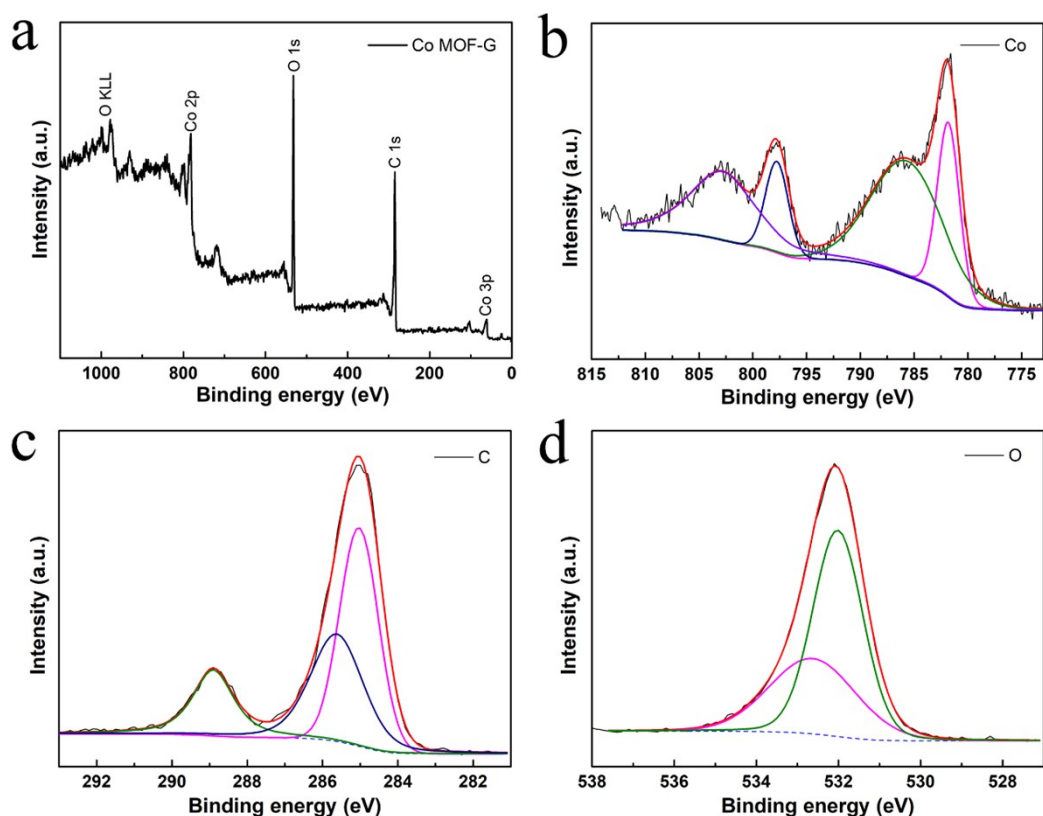

**Figure S7.** XPS spectra of the 2D Co MOF-G hybrid: (a) survey, (b) Co 2p, (c) C 1s, and (d) O 1s.

The XPS confirms the presence of Co, C, and O elements in the Co MOF-G hybrid (**Figure S7a**). The Co 2p spectrum (**Figure S7b**) demonstrates two main peaks at 781.9 and 797.8 eV assigned to Co 2p<sub>3/2</sub> and Co 2p<sub>1/2</sub>, together with two corresponding satellite peaks at 786.0 and 803.1 eV, respectively. The C spectrum (**Figure S7c**) depicts three peaks at 285.0, 288.9, and 290.0 eV, which are assigned to C=C, C–C and O=C–O, respectively. The O spectrum (**Figure S7d**) possesses two peaks at 531.9 and 532.7 eV, which are ascribed to the hydroxyl and chemisorbed water, respectively.

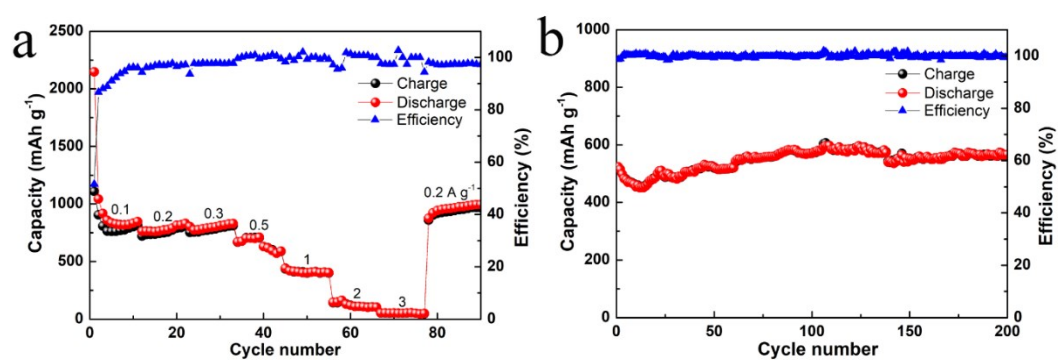

**Figure S8.** Electrochemical performances of the 2D NiCo MOF electrode: (a) rate performance at different current densities of 0.1, 0.2, 0.3, 0.5, 1, 2, and 3 A g<sup>-1</sup> and (b) cycle performance at 0.5 A g<sup>-1</sup>.

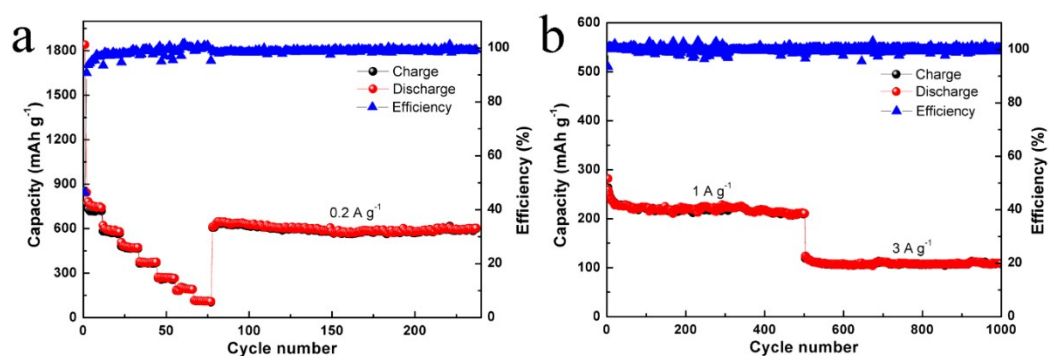

**Figure S9.** Electrochemical performances of the 2D Co MOF-G electrode: (a) rate performance at different current densities of 0.1, 0.2, 0.3, 0.5, 1, 2, and 3 A g<sup>-1</sup> and cycle performance at 0.2 A g<sup>-1</sup> and (b) cycle performance at 1 and 3 A g<sup>-1</sup>.

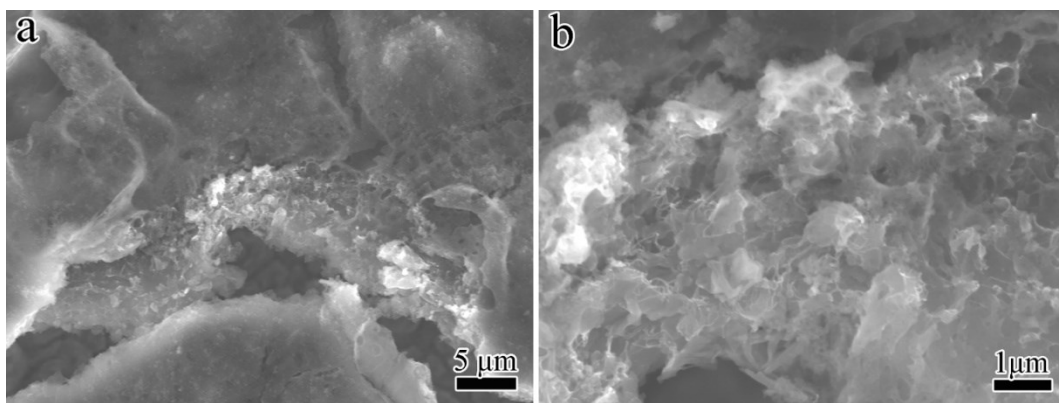

**Figure S10.** (a, b) SEM images of the hierarchical 2D NiCo MOF-G electrode on the state of discharge after 100 cycles.

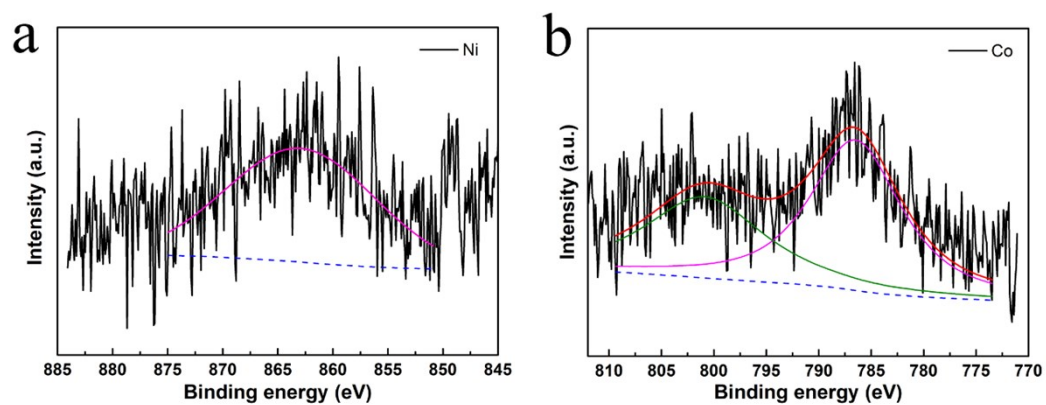

**Figure S11.** XPS spectra of the 2D NiCo MOF-G electrode after discharge: (a) Ni 2p and (b) Co 2p.

## Reference

1. H. Song, L. Shen, J. Wang and C. Wang, Phase segregation and self-nano-crystallization induced high performance Li-storage in metal-organic framework bulks for advanced lithium ion batteries, *Nano Energy*, 2017, **34**, 47-57.
2. Q. Liu, L. Yu, Y. Wang, Y. Ji, J. Horvat, M.-L. Cheng, X. Jia and G. Wang, Manganese-based layered coordination polymer: synthesis, structural characterization, magnetic property, and electrochemical performance in lithium-ion batteries, *Inorg. Chem.*, 2013, **52**, 2817-2822.
3. S. Maiti, A. Pramanik, U. Manju and S. Mahanty,  $\text{Cu}_3(1, 3, 5\text{-benzenetricarboxylate})_2$  metal-organic framework: a promising anode material for lithium-ion battery, *Micropor. Mesopor. Mater.*, 2016, **226**, 353-359.
4. S. He, X. Zhou, Z. Li, J. Wang, L. Ma and S. Yang, Fluorine doping strengthens the lithium-storage properties of the Mn-based metal-organic framework, *ACS Appl. Mater. Interfaces*, 2017, **9**, 26907-26914.
5. Y. Wang, Q. Qu, G. Liu, V. S. Battaglia and H. Zheng, Aluminum fumarate-based metal organic frameworks with tremella-like structure as ultrafast and stable anode for lithium-ion batteries, *Nano Energy*, 2017, **39**, 200-210.
6. C. H. Zhang, W. Q. Hu, H. Jiang, J. K. Chang, M. S. Zheng, Q. H. Wu and Q. F. Dong, Electrochemical performance of MIL-53(Fe)@RGO as an organic anode material for Li-ion batteries, *Electrochim. Acta*, 2017, **246**, 528-535.
7. C. Dong and L. Xu, Cobalt-and cadmium-based metal-organic frameworks as high-performance anodes for sodium ion batteries and lithium ion batteries, *ACS Appl. Mater. Interfaces*, 2017, **9**, 7160-7168.

8. Y.-Y. Wang, M. Zhang, S.-L. Li, S.-R. Zhang, W. Xie, J.-S. Qin, Z.-M. Su and Y.-Q. Lan, Diamondoid-structured polymolybdate-based metal-organic frameworks as high-capacity anodes for lithium-ion batteries, *Chem. Commun.*, 2017, **53**, 5204-5207.
9. T. Gong, X. Lou, E.-Q. Gao and B. Hu, Pillared-layer metal-organic frameworks for improved lithium-ion storage performance, *ACS Appl. Mater. Interfaces*, 2017, **9**, 21839-21847.
10. C. Li, X. Hu, X. Lou, L. Zhang, Y. Wang, J.-P. Amoureux, M. Shen, Q. Chen and B. Hu, The organic-moiety-dominated Li<sup>+</sup> intercalation/deintercalation mechanism of a cobalt-based metal-organic framework, *J. Mater. Chem. A*, 2016, **4**, 16245-16251.
11. X.-M. Lin, J.-L. Niu, J. Lin, L.-M. Wei, L. Hu, G. Zhang and Y.-P. Cai, Lithium-ion-battery anode materials with improved capacity from a metal-organic framework, *Inorg. Chem.*, 2016, **55**, 8244-8247.
12. J. Montero, D. Arenas-Esteban, D. Ávila-Brandé, E. Castillo-Martínez, S. Licoccia and J. Carretero-González, Lithium ion storage in 1D and 2D redox active metal-organic frameworks, *Electrochim. Acta*, 2020, **341**, 136063.
